# Supplementary material for: Recognition of Higher Order Patterns in Proteins: Immunologic Kernels
Source: PLOS journal article supplement (doi:10.1371/journal.pone.0070115), 2013-07-29
Supplement: S4 (10.1371/journal.pone.0070115.s004) [file journal.pone.0070115.s004]

# **Figure S4: Cross-correlation of MHC-I predicted binding affinity relative to Netchop 20S proteasome cleavage of tetanus toxin**

The sequence for tetanus toxoid (gi 40770 ) was submitted to NetChop 3.1 webserver<sup>1</sup> (<http://www.cbs.dtu.dk/services/NetChop/>) and the cleavage predictions for the 20S proteasomal subunit were retrieved. The output was cross-correlated against standardized individual MHC-I binding affinities indexed to the N-terminal amino acid of the binding 9-mer peptide. The scissile bond cleavage position is indicated using the standard peptidase notation.

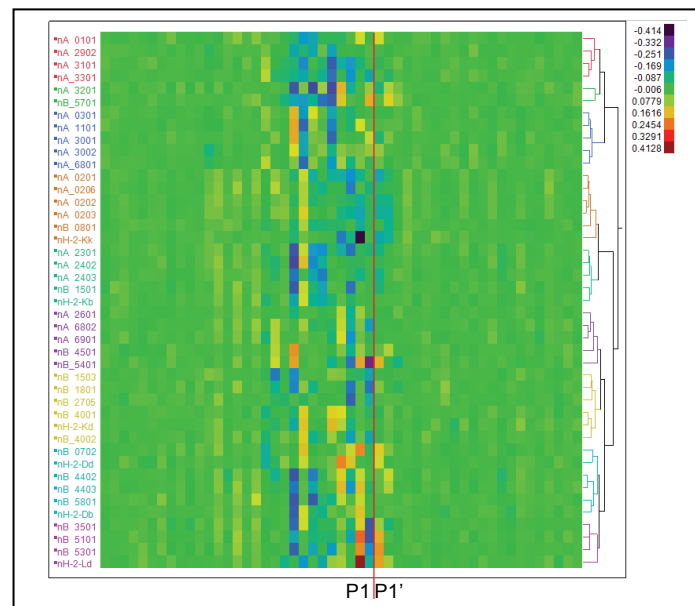

- 1 Nielsen, M., Lundegaard, C., Lund, O. & Kesmir, C. The role of the proteasome in generating cytotoxic T-cell epitopes: insights obtained from improved predictions of proteasomal cleavage. *Immunogenetics* **57**, 33-41, doi:10.1007/s00251-005-0781-7 (2005).
